# Supplementary material
Source: Springer Nature journal article supplement (https://www.springermedizin.de/resource/supplementary/12876_2010_499_MOESM3_ESM.pdf/9436852)

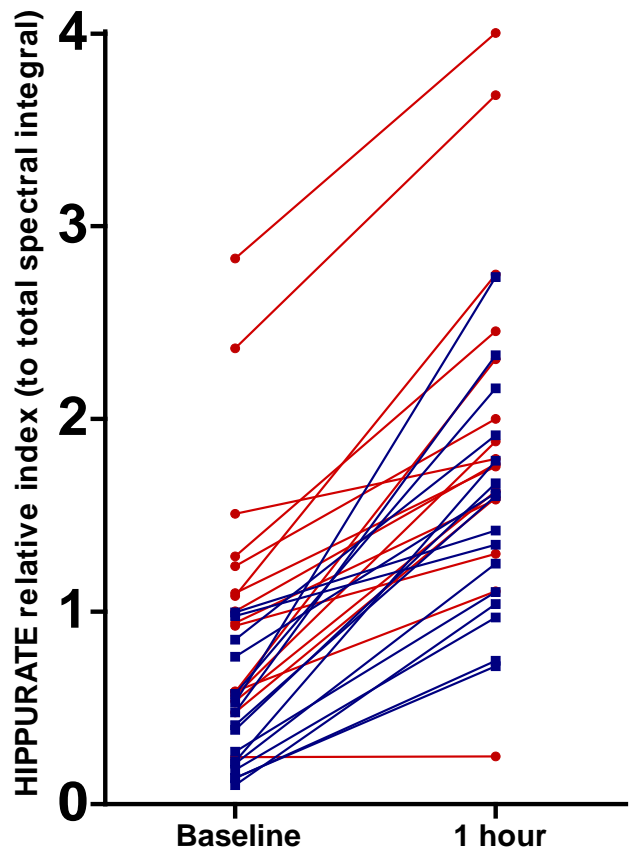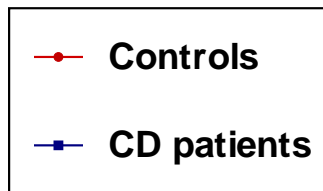

Supplement: MOESM3 [file 9436852]
